# Supplementary material
Source: publisher site journal article supplement (https://www.dovepress.com/article/318679)
Supplement: Supplementary file 1 [file get_supplementary_file.php]

**Supplemental materials**

# Effect of 5 years of exercise intervention at different intensities on brain structure in older adults from the general population. A Generation 100 substudy

Pani Jasmine1,2, Reitlo Line Skarsem1,2, Evensmoen Hallvard Røe2, Lydersen Stian3, Wisløff Ulrik4,5, Stensvold Dorthe4,6, Håberg Asta Kristine1,2*

1Department of Neuromedicine and Movement Science, Faculty of Medicine and Health Sciences, NTNU (Norwegian University of Science and Technology), Trondheim, Norway; 2Department of Radiology and Nuclear Medicine, St. Olavs Hospital, Trondheim University Hospital, Trondheim, Norway; 3Department of Mental Health, Faculty of Medicine and Health Sciences, NTNU (Norwegian University of Science and Technology), Trondheim, Norway; 4Department of Circulation and Medical Imaging, Faculty of Medicine and Health Sciences, NTNU (Norwegian University of Science and Technology), Trondheim, Norway; 5School of Human Movement & Nutrition Sciences, University of Queensland, Queensland, Australia; 6Department of Cardiology, St. Olavs Hospital, Trondheim University Hospital, Trondheim, Norway

Correspondence: Asta Kristine Håberg, MD, PhD

1Department of Neuromedicine and Movement Science, Faculty of Medicine and Health Sciences, NTNU (Norwegian University of Science and Technology), Trondheim, Norway

NTNU, Faculty of Medicine and Health Sciences, N-7491 Trondheim, Norway

2Department of Radiology and Nuclear Medicine, St. Olavs Hospital, Trondheim University Hospital, Trondheim, Norway

St. Olavs Hospital HF, Postbox 3250 Torgarden, NO-7006 Trondheim, Norway

Telephone: +47 90 25 91 47

Email: [asta.haberg@ntnu.no](mailto:asta.haberg@ntnu.no)

Supplementary Content

**Supplementary Methods**

Sleep index

CRF and grip strength

**Supplementary Tables**

**Supplementary Table 1.** Demographics and clinical data for the Generation 100 Study and Generation 100 brain MRI participants at baseline

**Supplementary Table 2.** Demographics and clinical data for control, MICT and HIIT participants at the 1-year examination

**Supplementary Table 3.** Demographics and clinical data for control, MICT and HIIT participants at the 3-year examination

**Supplementary Table 4.** Demographics and clinical data for control, MICT and HIIT participants at the 5-year examination

**Supplementary Table 5.** Adherence to physical activity guideline for the control, and to the MICT and HIIT intervention for the MICT and HIIT groups given as number of participants (%) fulfilling the adherence requirements

**Supplementary Table 6.** Linear mixed model analyses of the hippocampal long-axis and subfield volumes during 5 years of intervention (Model 1) in HIIT and MICT groups compared to control group

**Supplementary Table 7.** Linear mixed model analyses of brain volumes during 5 years of intervention, corrected for CRF (Model 2), in HIIT and MICT groups compared to control group

**Supplementary Table 8.** Linear mixed model analyses of the hippocampal long-axis and subfield volumes during 5 years of intervention, corrected for CRF (Model 2), in HIIT and MICT groups compared to control group

**Supplementary Table 9.** Linear mixed model analyses of brain volumes during 5 years of intervention (Model 1) in combined MICT&HIIT group compared to control group

**Supplementary Table 10.** Linear mixed model analyses of brain volumes during 5 years of intervention, corrected for CRF (Model 2), in combined MICT&HIIT group compared to control group

**Supplementary Table 11.** Linear mixed model analyses of the hippocampal long-axis and subfield volumes during 5 years of intervention (Model 1) in combined MICT&HIIT group compared to control group

**Supplementary Table 12.** Linear mixed model analyses of the hippocampal long-axis and subfield volumes during 5 years of intervention, corrected for CRF (Model 2) in combined MICT&HIIT group compared to control group

**Supplementary Table 13.** Linear mixed model analyses with CRF as dependent variable during 5 years of intervention in control, MICT and HIIT groups

**Supplementary Table 14.** Longitudinal linear mixed model analyses with CRF as dependent variable during 5 years of intervention in combined MICT&HIIT group compared to control group

**References**

# Supplemental methods

Sleep index

From the questionnaire an index for sleep was calculated based on the questions: “How often in the last three months have you: 1) Had difficulty falling asleep at night? 2) Woken up repeatedly during the night? 3) Woken too early and couldn’t get back to sleep?”. The response options were: “Never/seldom” scored as 1, “Sometimes” scored as 2, “Several times a week” scored as 3 1. The three questions were collapsed into one index.

CRF and grip strength

CRF was assessed objectively as VO2peak using graded maximal exercise testing on a motor-driven treadmill (nInclusion = 102, n5-year = 78) or exercise bike (nInclusion = 3, n5-year = 7). Participants with cardiovascular diseases were tested under ECG monitoring and the exercise testing followed the guidelines of the American College of Cardiology/American Heart Association 2. Participants warmed up at an individually adjusted submaximal level for 10 minutes. A mask for measuring oxygen consumption, blood pressure cuff, pulse belt and heart rate electrodes were then fitted on the participant. The test started with the speed and inclination from the last part of the warm-up period. The incline of the treadmill was increased by 2% or the speed was increased by 1 km/h about every second minute. Participants were encouraged to continue until exhaustion. VO2max was reached when the respiratory exchange ratio was ≥ 1.05 and VO2 did not increase more than 2 mL between two 30-seconds epochs. If the participant was unable to meet these criteria, VO2peak was estimated instead. VO2peak was calculated from the mean of the three successively highest 10-seconds VO2 registrations. During the study period, 26-34% of the participants did not achieve VO2max, and for those VO2peak was reported (Table 1, Supplementary Tables 2-4). The registered VO2max/peak values were normalized to body weight (mL/kg/min). See Stensvold et al 3 for more details on the VO2peak measurements.

For grip strength the participants were tested three times on their dominant hand and the mean score of the three trials are reported.

# Supplementary tables

**Supplementary Table 1.** Demographics and clinical data for the Generation 100 Study and Generation 100 brain MRI participants at baseline

|  | **Generation 100 Study**  **(N=1462)** | **Generation 100 brain MRI (N=105)** | ***p*-value** |
| --- | --- | --- | --- |
| Womena (*%)* | 50.5 | 49.5 | 0.85 |
| Living with othersa (*%Yes)* | 75.2 | 70.2 | 0.25 |
| Educationc *%Primary school* | 15.3 | 8.7 | **0.003** |
| *%High school* | 35.2 | 26.9 |  |
| *%University* | 49.5 | 64.4 |  |
| Smokinga (*% No)* | 91.5 | 91.3 | 0.94 |
| Ageb (years) | 72.4 (2.1) | 72.0 (1.9) | **0.04** |
| Heightb (cm) | 170.1 (8.8) | 170.1 (8.9) | 0.96 |
| Weightb (kg) | 75.5 (13.5) | 75.2 (12.6) | 0.84 |
| Fatb (%) | 30.3 (8.1) | 29.4 (7.7) | 0.27 |
| Muscle massb (%) | 38.0 (4.9) | 38.6 (4.5) | 0.26 |
| BMIb (kg/m2) | 26.0 (3.6) | 25.93 (3.3) | 0.85 |
| Visceral fatb (cm2) | 115.3 (33.3) | 112.5 (36.6) | 0.40 |
| Waist circumferenceb (cm) | 94.2 (11.1) | 93.7 (10.6) | 0.64 |
| SBPb (mmHg) | 134.1 (17.6) | 133.9 (17.2) | 0.93 |
| DBPb (mmHg) | 75.2 (9.6) | 75.3 (8.5) | 0.88 |
| RHRb (beats/min) | 65.1 (10.9) | 63.6 (9.4) | 0.19 |
| hsCRPc (mg/L) | 2.4 (4.1) | 2.1 (3.4) | 0.38 |
| HbA1cc (%) | 5.7 (0.5) | 5.6 (0.3) | **0.001** |
| Glucosec (mmol/L) | 5.7 (0.9) | 5.6 (0.7) | 0.42 |
| HDLb (mmol/L) | 1.7 (0.5) | 1.9 (0.6) | **0.01** |
| LDLb (mmol/L) | 3.4 (1.0) | 3.4 (0.9) | 0.62 |
| TCb (mmol/L) | 5.6 (1.1) | 5.8 (1.0) | 0.25 |
| TGb (mmol/L) | 1.1 (0.6) | 1.0 (0.5) | **0.04** |
| Diabetesa (*%No)* | 94.6 | 98.1 | 0.13 |
| VO2peakb(mL/kg/min) | 28.6 (6.4) | 30.2 (6.4) | **0.01** |
| VO2peak or VO2max (%VO2max)a# | 59.8 | 65.4 | 0.27 |
| Grip strengthb (kg) | 34.4 (10.9) | 35.8 (10.4) | 0.21 |
| Sleep indexb (total score) | 5.4 (1.5) | 5.2 (1.5) | 0.13 |
| SF-8 Physical healtha | 51.9 (6.2) | 52.9 (5.9) | 0.07 |
| SF-8 Mental healtha | 54.1 (5.8) | 55.4 (4.4) | **0.02** |
| HADSb (total score) | 6.2 (4.4) | 4.6 (3.6) | **<0.001** |

*p*-values < 0.05 are in bold font. The continuous measures are shown as mean and standard deviation in the parentheses. Categorical data is reported as percentages.

a Chi-square; b t-test; c Mann-Whitney U test

# Percentage of participants that achieved VO2max during the graded maximal exercise testing.

BMI: body mass index; DBP: diastolic blood pressure; SBP: systolic blood pressure; RHR: resting heart rate; hsCRP: high sensitivity C-reactive protein; HbA1c: glycated hemoglobin; HDL: high-density lipoprotein; LDL: low-density lipoprotein; TC: total cholesterol; TG: triglycerides; SF-8: short form health survey questionnaire; HADS: Hospital Anxiety and Depression Scale.

**Supplementary Table 2.** Demographics and clinical data for control, MICT and HIIT participants at the 1-year examination

|  | **Control**  **(N=42)** | **MICT**  **(N=21)** | **HIIT**  **(N=31)** |
| --- | --- | --- | --- |
| Women (*%)* | 52.4 | 52.4 | 45.2 |
| Living with others (*%Yes)* | 65.0 | 71.4 | 74.2 |
| Education*%Primary school* | 4.8 | 14.3 | 6.7 |
| *%High school* | 31.0 | 14.3 | 20.0 |
| *%University* | 64.3 | 71.4 | 73.3 |
| Smoking(*%No)* | 90.2 | 95.2 | 90.3 |
| Age (years) | 72.8 (1.8) | 72.9 (1.8) | 73.1 (2.0) |
| Height (cm) | 168.2 (9.2) | 170.8 (8.0) | 169.9 (8.7) |
| Weight (kg) | 72.0 (13.9) | 75.2 (10.2) | 74.4 (12.9) |
| Fat (%) | 29.4 (7.7) | 29.5 (7.9) | 27.3 (7.7) |
| Muscle mass (%) | 38.5 (4.6) | 38.7 (4.4) | 39.6 (4.2) |
| BMI (kg/m2) | 25.3 (3.8) | 25.8 (3.7) | 25.5 (3.1) |
| Visceral fat (cm2) | 108.5 (33.7) | 107.7 (29.4) | 106.2 (29.4) |
| Waist circumference (cm) | 91.0 (12.8) | 92.4 (9.5) | 90.9 (10.4) |
| SBP right (mmHg) | 133.4 (14.8) | 133.0 (15.9) | 133.4 (22.4) |
| DBP right (mmHg) | 73.3 (7.2) | 76.4 (8.0) | 72.1 (11.4) |
| RHR (beats/min) | 64.3 (10.0) | 65.3 (8.1) | 60.8 (7.1) |
| hsCRP (mg/L) | 2.2 (3.4) | 2.9 (5.2) | 1.8 (1.8) |
| HbA1c (%) | 5.6 (0.3) | 5.6 (0.4) | 5.5 (0.4) |
| Glucose (mmol/L) | 5.5 (0.7) | 5.3 (0.7) | 5.5 (0.5) |
| HDL (mmol/L) | 1.9 (0.6) | 1.7 (0.3) | 1.9 (0.5) |
| LDL (mmol/L) | 3.5 (1.0) | 3.3 (0.6) | 3.3 (0.9) |
| TC (mmol/L) | 5.8 (1.1) | 5.3 (0.9) | 5.5 (1.1) |
| TG (mmol/L) | 0.9 (0.4) | 0.9 (0.3) | 0.9 (0.4) |
| Diabetes (*%No)* | 97.5 | 100.0 | 90.3 |
| VO2peak (mL/kg/min) | 31.9 (7.0) | 31.9 (5.4) | 32.3 (6.5) |
| VO2peak or VO2max (%VO2max)# | 73.7 | 55.0 | 80.0 |
| Grip strength (kg) | 33.5 (11.8) | 38.1 (10.3) | 37.2 (9.4) |
| Sleep index (total score) | 5.2 (1.4) | 5.2 (1.9) | 4.7 (1.2) |
| SF-8 Physical health | 54.1 (5.3) | 48.0 (9.7) | 52.0 (7.2) |
| SF-8 Mental health | 55.7 (5.0) | 54.6 (5.6) | 56.3 (3.8) |
| HADSb (total score) | 4.8 (3.8) | 5.8 (4.7) | 4.0 (3.2) |

# Percentage of participants that achieved VO2max during the graded maximal exercise testing.

The continuous measures are shown as mean and standard deviation in the parentheses. Categorical data is reported as percentages. MICT: Moderate intensity continuous training; HIIT: High intensity interval training; BMI: body mass index; DBP: diastolic blood pressure; SBP: systolic blood pressure; RHR: resting heart rate; hsCRP: high sensitivity C-reactive protein; HbA1c: glycated hemoglobin; HDL: high-density lipoprotein; LDL: low-density lipoprotein; TC: total cholesterol; TG: triglycerides; SF-8: short form health survey questionnaire; HADS: Hospital Anxiety and Depression Scale.

**Supplementary Table 3.** Demographics and clinical data for control, MICT and HIIT participants at the 3-year examination

|  | **Control**  **(N=39)** | **MICT**  **(N=21)** | **HIIT**  **(N=30)** |
| --- | --- | --- | --- |
| Women (*%)* | 51.3 | 52.4 | 46.7 |
| Living with others (*%Yes)* | 62.2 | 77.8 | 73.3 |
| Education *%Primary school* | 5.1 | 14.3 | 6.9 |
| *%High school* | 30.8 | 14.3 | 17.2 |
| *%University* | 64.1 | 71.4 | 75.9 |
| Smoking(*%No)* | 89.2 | 94.4 | 93.3 |
| Age (years) | 74.8 (1.8) | 74.9 (1.8) | 75.1 (2.0) |
| Height (cm) | 167.6 (9.4) | 171.0 (8.1) | 170.1 (8.7) |
| Weight (kg) | 72.2 (12.6) | 76.0 (11.4) | 75.7 (13.1) |
| Fat (%) | 30.6 (7.9) | 29.7 (8.0) | 29.5 (6.6) |
| Muscle mass (%) | 37.6 (5.0) | 38.4 (4.4) | 38.6 (3.9) |
| BMI (kg/m2) | 25.6 (3.3) | 26.0 (3.9) | 26.1 (3.0) |
| Visceral fat (cm2) | 113.3 (29.8) | 111.6 (30.5) | 114.2 (29.6) |
| Waist circumference (cm) | 93.7 (11.6) | 94.3 (10.2) | 93.1 (10.1) |
| SBP right (mmHg) | 135.2 (15.6) | 130.0 (17.1) | 131.2 (21.2) |
| DBP right (mmHg) | 73.2 (8.1) | 75.6 (9.9) | 72.9 (10.2) |
| RHR (beats/min) | 61.2 (8.9) | 63.6 (10.5) | 59.9 (6.8) |
| hsCRP (mg/L) | 3.4 (9.8) | 1.9 (2.4) | 2.6 (4.7) |
| HbA1c (%) | 5.4 (0.3) | 5.5 (0.6) | 5.5 (0.5) |
| Glucose (mmol/L) | 5.5 (0.6) | 5.4 (0.8) | 5.5 (0.6) |
| HDL (mmol/L) | 2.0 (0.6) | 1.7 (0.5) | 1.9 (0.7) |
| LDL (mmol/L) | 3.8 (1.0) | 3.1 (0.6) | 3.3 (1.0) |
| TC (mmol/L) | 6.0 (1.2) | 5.2 (0.7) | 5.5 (1.2) |
| TG (mmol/L) | 0.9 (0.5) | 1.0 (0.5) | 1.0 (0.4) |
| Diabetes (*%No)* | 97.3 | 88.9 | 89.7 |
| VO2peak (mL/kg/min) | 31.3 (8.0) | 29.7 (6.2) | 31.8 (7.3) |
| VO2peak or VO2max (%VO2max)# | 66.7 | 52.9 | 72.4 |
| Grip strength (kg) | 28.0 (10.4) | 32.3 (10.5) | 30.8 (10.0) |
| Sleep index (total score) | 5.3 (1.5) | 5.4 (1.6) | 4.7 (1.1) |
| SF-8 Physical health | 52.3 (6.3) | 49.5 (8.7) | 52.6 (5.4) |
| SF-8 Mental health | 55.2 (5.1) | 54.3 (6.4) | 57.6 (2.2) |
| HADS (total score) | 5.4 (4.1) | 5.4 (5.0) | 4.3 (2.6) |

# Percentage of participants that achieved VO2max during the graded maximal exercise testing.

The continuous measures are shown as mean and standard deviation in the parentheses. Categorical data is reported as percentages. MICT: Moderate intensity continuous training; HIIT: High intensity interval training; BMI: body mass index; DBP: diastolic blood pressure; SBP: systolic blood pressure; RHR: resting heart rate; hsCRP: high sensitivity C-reactive protein; HbA1c: glycated hemoglobin; HDL: high-density lipoprotein; LDL: low-density lipoprotein; TC: total cholesterol; TG: triglycerides; SF-8: short form health survey questionnaire; HADS: Hospital Anxiety and Depression Scale.

**Supplementary Table 4.** Demographics and clinical data for control, MICT and HIIT participants at the 5-year examination

|  | **Control**  **(N=35)** | **MICT**  **(N=21)** | **HIIT**  **(N=29)** |
| --- | --- | --- | --- |
| Women (*%)* | 48.6 | 52.4 | 44.8 |
| Living with others (*%Yes)* | 68.8 | 78.9 | 72.0 |
| Education *%Primary school* | 2.9 | 14.3 | 7.1 |
| *%High school* | 31.4 | 14.3 | 17.9 |
| *%University* | 65.7 | 71.4 | 75.0 |
| Smoking(*%No)* | 87.5 | 94.7 | 92.0 |
| Age (years) | 76.6 (1.7) | 76.9 (1.8) | 77.1 (2.0) |
| Height (cm) | 168.7 (10.5) | 170.0 (8.2) | 168.6 (7.9) |
| Weight (kg) | 74.0 (15.0) | 75.1 (10.8) | 74.1 (11.5) |
| Fat (%) | 30.8 (8.3) | 31.5 (7.6) | 30.0 (5.9) |
| Muscle mass (%) | 37.6 (4.9) | 37.3 (4.2) | 38.0 (3.4) |
| BMI (kg/m2) | 25.9 (3.8) | 26.0 (3.6) | 26.0 (2.5) |
| Visceral fat (cm2) | 117.6 (36.2) | 116.5 (29.8) | 115.8 (26.1) |
| Waist circumference (cm) | 94.2 (12.9) | 94.8 (8.9) | 94.7 (11.1) |
| SBP/DBP right (mmHg) | 135.8 (17.7) | 132.6 (18.7) | 136.4 (19.1) |
| DBP right (mmHg) | 77.0 (7.3) | 76.7 (13.0) | 75.3 (11.5) |
| RHR (beats/min) | 61.6 (8.5) | 62.3 (6.2) | 60.4 (8.3) |
| hsCRP (mg/L) | 3.8 (5.8) | 2.2 (3.7) | 2.8 (4.9) |
| HbA1c (%) | 5.3 (0.3) | 5.5 (0.5) | 5.4 (0.5) |
| Glucose (mmol/L) | 5.3 (0.4) | 5.4 (1.1) | 5.4 (0.6) |
| HDL (mmol/L) | 1.7 (0.5) | 1.7 (0.5) | 1.8 (0.5) |
| LDL (mmol/L) | 3.3 (1.1) | 2.8 (0.9) | 3.2 (0.8) |
| TC (mmol/L) | 5.6 (1.1) | 4.9 (1.0) | 5.6 (0.9) |
| TG (mmol/L) | 1.0 (0.4) | 0.9 (0.4) | 1.0 (0.4) |
| Diabetes (*%No)* | 100.0 | 89.5 | 92.3 |
| VO2peak (mL/kg/min) | 30.1 (7.6) | 28.6 (5.3) | 30.5 (6.1) |
| VO2peak or VO2max (%VO2max)# | 77.4 | 55.6 | 70.8 |
| Grip strength (kg) | 28.4 (10.1) | 29.4 (10.0) | 30.3 (10.4) |
| Sleep index (total score) | 5.4 (1.4) | 5.6 (1.9) | 5.1 (1.3) |
| SF-8 Physical health | 51.0 (7.7) | 48.2 (9.1) | 51.5 (7.8) |
| SF-8 Mental health | 56.0 (5.0) | 53.5 (7.5) | 57.2 (2.0) |
| HADS (total score) | 6.0 (3.6) | 5.9 (5.1) | 4.0 (3.3) |
| MoCA (total score) | 25.6 (2.7) | 26.6 (3.3) | 26.4 (2.8) |

# Percentage of participants that achieved VO2max during the graded maximal exercise testing.

The continuous measures are shown as mean and standard deviation in the parentheses. Categorical data is reported as percentages. MICT: Moderate intensity continuous training; HIIT: High intensity interval training; BMI: body mass index; DBP: diastolic blood pressure; SBP: systolic blood pressure; RHR: resting heart rate; hsCRP: high sensitivity C-reactive protein; HbA1c: glycated hemoglobin; HDL: high-density lipoprotein; LDL: low-density lipoprotein; TC: total cholesterol; TG: triglycerides; SF-8: short form health survey questionnaire; HADS: Hospital Anxiety and Depression Scale; MoCA: Montreal Cognitive Assessment.

**Supplementary Table 5.** Adherence to physical activity guideline for the control, and to the MICT and HIIT intervention for the MICT and HIIT groups given as number of participants (%) fulfilling the adherence requirements

|  | **Control** | **MICT** | **HIIT** |
| --- | --- | --- | --- |
| 1 year | N=42 | N=21 | N=31 |
|  | 38 (90.5%) | 16 (76.2%) | 23 (74.2%) |
| 3 years | N=39 | N=21 | N=30 |
|  | 32 (82.1%) | 15 (71.4%) | 26 (86.7%) |
| 5 years | N=35 | N=21 | N=29 |
|  | 33 (94.3%) | 18 (85.7%) | 23 (79.3%) |

MICT: Moderate intensity continuous training; HIIT: High intensity interval training.
Adherence to the control was defined as ≥ 75 minutes of physical activity per week; as Adherence to MICT: ≥ 30 minutes at 11-14 on the Borg scale per week; as Adherence to HIIT: ≥ 30 minutes ≥ 15 on the Borg scale per week

**Supplementary Table 6.** Linear mixed model analyses of the hippocampal long-axis and subfield volumes during 5 years of intervention (Model 1) in HIIT and MICT groups compared to control group

|  | **Head** | | | **Body** | | | **Tail** | | | **CA1** | | | **CA3** | | | **DG** | | |
| --- | --- | --- | --- | --- | --- | --- | --- | --- | --- | --- | --- | --- | --- | --- | --- | --- | --- | --- |
|  | *β* | *CI* | *p* | *β* | *CI* | *p* | *β* | *CI* | *p* | *β* | *CI* | *p* | *β* | *CI* | *p* | *β* | *CI* | *p* |
| 1 year * MICT | 0.01 | -0.02,  0.04 | 0.63 | 0.01 | -0.01,  0.03 | 0.33 | 0.01 | -0.01,  0.03 | 0.31 | 2.68 | -5.94,  11.30 | 0.54 | 1.59 | -3.14,  6.32 | 0.51 | 0.53 | -3.18,  4.24 | 0.78 |
| 3 years * MICT | -0.00 | -0.03,  0.03 | 0.98 | -0.01 | -0.03,  0.02 | 0.51 | 0.01 | -0.01,  0.03 | 0.38 | -0.96 | -9.86,  7.94 | 0.83 | 1.96 | -2.93,  6.84 | 0.43 | 0.74 | -3.09,  4.57 | 0.71 |
| 5 years * MICT | -0.02 | -0.05,  0.02 | 0.29 | 0.01 | -0.02,  0.03 | 0.59 | 0.01 | -0.01,  0.04 | 0.15 | -2.22 | -11.01,  6.58 | 0.62 | 1.33 | -3.50,  6.16 | 0.59 | 2.16 | -1.63,  5.95 | 0.26 |
| 1 year * HIIT | -0.00 | -0.03,  0.03 | 0.89 | -0.01 | -0.03,  0.01 | 0.27 | -0.01 | -0.03,  0.01 | 0.37 | -7.74 | -15.48,  -0.01 | **0.050** | 0.28 | -3.97,  4.52 | 0.90 | 0.47 | -2.86,  3.80 | 0.78 |
| 3 years * HIIT | -0.02 | -0.05,  0.01 | 0.30 | -0.03 | -0.05,  -0.01 | **0.003** | -0.01 | -0.03,  0.01 | 0.18 | -11.59 | -19.53,  -3.64 | **0.004** | -1.68 | -6.04,  2.68 | 0.45 | -0.74 | -4.17,  2.68 | 0.67 |
| 5 years * HIIT | -0.02 | -0.05,  0.01 | 0.16 | -0.02 | -0.04,  0.00 | 0.09 | -0.01 | -0.02,  0.01 | 0.52 | -12.85 | -20.90,  -4.80 | **0.002** | -4.40 | -8.82,  0.02 | 0.06 | -1.27 | -4.74,  2.20 | 0.47 |
| 1 year | -0.01 | -0.03,  0.01 | 0.43 | -0.01 | -0.02,  0.01 | 0.27 | -0.01 | -0.02,  0.00 | 0.24 | 2.04 | -2.90,  6.98 | 0.42 | -1.33 | -4.04,  1.38 | 0.34 | -2.14 | -4.27,  -0.02 | **0.048** |
| 3 years | -0.02 | -0.04,  -0.00 | **0.038** | -0.01 | -0.02,  0.01 | 0.42 | -0.01 | -0.02,  0.00 | 0.22 | 2.40 | -2.68,  7.48 | 0.36 | -1.00 | -3.79,  1.79 | 0.48 | -2.84 | -5.03,  -0.65 | **0.011** |
| 5 years | -0.02 | -0.04,  -0.00 | **0.017** | -0.03 | -0.05,  -0.02 | **<0.001** | -0.02 | -0.03,  -0.01 | **0.005** | 3.04 | -2.20,  8.29 | 0.26 | 0.12 | -2.76,  3.00 | 0.94 | -4.28 | -6.54,  -2.02 | **<0.001** |

*p-*values < 0.05 are in bold font. Single asterisk (*) indicates interaction*.* Beta (β) is the estimated regression coefficient, CI is the 95% confidence interval. In the table 1 year, 3 years and 5 years are compared to baseline and relative to the control group.Volumes of the long axis are included in the model as mL, the subfields are reported as mm3. CA1=cornus ammonis 1; CA3=cornus ammonis 3; DG=dentate gyrus. Head, body and tail are from the long-axis, while CA1, CA3 and DG are from the subfields. HIIT: High intensity interval training; MICT: Moderate intensity continuous training. The analysis is corrected for age at baseline, sex and education. Brain volumes were corrected for intracranial volume (ICV) using the residual method.

**Supplementary Table 7.** Linear mixed model analyses of brain volumes during 5 years of intervention, corrected for CRF (Model 2), in HIIT and MICT groups compared to control group

|  | **Hippocampus** | | | **Caudate** | | | **Thalamus** | | | **Cortex** | | | **White matter** | | |
| --- | --- | --- | --- | --- | --- | --- | --- | --- | --- | --- | --- | --- | --- | --- | --- |
|  | *β* | *CI* | *p* | *β* | *CI* | *p* | *β* | *CI* | *p* | *β* | *CI* | *p* | *β* | *CI* | *p* |
| 1 year * MICT | 0.03 | -0.07,  0.13 | 0.54 | 0.02 | -0.09,  0.13 | 0.71 | 0.00 | -0.11,  0.11 | 0.95 | 0.34 | -5.03,  5.70 | 0.90 | -5.79 | -15.71,  4.12 | 0.25 |
| 3 years * MICT | -0.07 | -0.18,  0.04 | 0.19 | -0.02 | -0.14,  0.10 | 0.69 | -0.11 | -0.23,  0.01 | 0.07 | -5.41 | -11.23,  0.42 | 0.07 | -1.08 | -11.80,  9.64 | 0.84 |
| 5 years * MICT | -0.08 | -0.19,  0.02 | 0.12 | -0.04 | -0.15,  0.08 | 0.55 | -0.17 | -0.29,  -0.06 | **0.004** | -1.02 | -6.70,  4.66 | 0.72 | 0.44 | -10.02,  10.91 | 0.93 |
| 1 year * HIIT | 0.01 | -0.07,  0.10 | 0.78 | -0.02 | -0.11,  0.08 | 0.75 | -0.03 | -0.13,  0.06 | 0.51 | -3.25 | -7.89,  1.40 | 0.17 | 2.85 | -5.71,  11.41 | 0.51 |
| 3 years * HIIT | -0.09 | -0.18,  0.00 | 0.06 | -0.06 | -0.16,  0.04 | 0.23 | -0.09 | -0.19,  0.01 | 0.08 | -4.14 | -9.08,  0.80 | 0.10 | 5.95 | -3.13,  15.04 | 0.20 |
| 5 years * HIIT | -0.10 | -0.20,  -0.01 | **0.034** | -0.01 | -0.12,  0.09 | 0.80 | -0.08 | -0.18,  0.03 | 0.15 | -1.01 | -6.11,  4.10 | 0.70 | -0.58 | -9.95,  8.80 | 0.90 |
| 1 year | -0.10 | -0.15,  -0.04 | **0.001** | -0.09 | -0.15,  -0.02 | **0.007** | -0.14 | -0.20,  -0.08 | **<0.001** | -3.57 | -6.63,  -0.50 | **0.022** | 0.53 | -5.07,  6.13 | 0.85 |
| 3 years | -0.16 | -0.22,  -0.10 | **<0.001** | -0.10 | -0.17,  -0.04 | **0.002** | -0.25 | -0.32,  -0.18 | **<0.001** | -4.72 | -8.02,  -1.42 | **0.005** | -3.29 | -9.32,  2.75 | 0.29 |
| 5 years | -0.31 | -0.37,  -0.25 | **<0.001** | -0.21 | -0.28,  -0.14 | **<0.001** | -0.50 | -0.57,  -0.44 | **<0.001** | -20.67 | -24.03,  -17.31 | **<0.001** | -5.05 | -11.19,  1.09 | 0.11 |
| CRF | 0.00 | -0.00,  0.01 | 0.17 | 0.00 | -0.01,  0.01 | 0.87 | 0.00 | -0.00,  0.01 | 0.31 | 0.04 | -0.24,  0.33 | 0.77 | 0.20 | -0.35,  0.75 | 0.47 |

*p*-values < 0.05 are in bold font. Single asterisk (*) indicates interaction*.* Beta (β) is the estimated regression coefficient, CI is the 95% confidence interval. In the table 1 year, 3 years and 5 years are compared to baseline and relative to the control group.Brain volumes are included in the model as mL. MICT: Moderate intensity continuous training; HIIT: High intensity interval training; CRF: Cardiorespiratory fitness measured as VO2peak. The analysis is corrected for age at baseline, sex and education. Brain volumes were corrected for intracranial volume (ICV) using the residual method.

**Supplementary Table 8.** Linear mixed model analyses of the hippocampal long-axis and subfield volumes during 5 years of intervention, corrected for CRF (Model 2), in HIIT and MICT groups compared to control group

|  | **Head** | | | **Body** | | | **Tail** | | | **CA1** | | | **CA3** | | | **DG** | | |
| --- | --- | --- | --- | --- | --- | --- | --- | --- | --- | --- | --- | --- | --- | --- | --- | --- | --- | --- |
|  | *β* | *CI* | *p* | *β* | *CI* | *p* | *β* | *CI* | *p* | *β* | *CI* | *p* | *β* | *CI* | *p* | *β* | *CI* | *p* |
| 1 year * MICT | 0.01 | -0.02,  0.05 | 0.52 | 0.01 | -0.01,  0.04 | 0.37 | 0.01 | -0.01,  0.03 | 0.35 | 3.73 | -4.97,  12.42 | 0.40 | 1.53 | -2.95,  6.01 | 0.50 | 0.44 | -3.26,  4.13 | 0.82 |
| 3 years * MICT | 0.01 | -0.03,  0.04 | 0.70 | -0.00 | -0.03,  0.02 | 0.77 | 0.01 | -0.01,  0.03 | 0.49 | -1.30 | -10.70,  8.09 | 0.79 | 3.67 | -1.17,  8.51 | 0.14 | 0.75 | -3.25,  4.74 | 0.71 |
| 5 years * MICT | -0.01 | -0.05,  0.02 | 0.51 | 0.01 | -0.02,  0.03 | 0.50 | 0.01 | -0.01,  0.04 | 0.23 | -0.26 | -9.44,  8.91 | 0.96 | 1.06 | -3.67,  5.79 | 0.66 | 2.08 | -1.82,  5.98 | 0.30 |
| 1 year * HIIT | -0.00 | -0.03,  0.03 | 0.86 | -0.01 | -0.03,  0.01 | 0.34 | -0.01 | -0.03,  0.01 | 0.38 | -7.45 | -15.03,  0.13 | 0.06 | 0.65 | -3.25,  4.56 | 0.74 | 0.61 | -2.61,  3.83 | 0.71 |
| 3 years * HIIT | -0.01 | -0.04,  0.02 | 0.39 | -0.03 | -0.05,  -0.01 | **0.007** | -0.01 | -0.03,  0.01 | 0.41 | -11.88 | -19.93,  -3.84 | **0.004** | -1.91 | -6.05,  2.24 | 0.37 | -1.48 | -4.90,  1.93 | 0.40 |
| 5 years * HIIT | -0.02 | -0.06,  0.01 | 0.17 | -0.02 | -0.04,  0.01 | 0.18 | -0.01 | -0.03,  0.01 | 0.45 | -13.36 | -21.68,  -5.05 | **0.002** | -4.91 | -9.20,  -0.62 | **0.025** | -0.41 | -3.94,  3.13 | 0.82 |
| 1 year | -0.01 | -0.03,  0.01 | 0.36 | -0.01 | -0.02,  0.00 | 0.18 | -0.01 | -0.02,  0.00 | 0.26 | 1.67 | -3.23,  6.58 | 0.50 | -1.49 | -4.02,  1.04 | 0.25 | -2.36 | -4.44,  -0.27 | **0.027** |
| 3 years | -0.02 | -0.04,  -0.00 | **0.040** | -0.01 | -0.02,  0.01 | 0.33 | -0.01 | -0.02,  0.00 | 0.06 | 3.29 | -2.00,  8.57 | 0.22 | -1.00 | -3.72,  1.72 | 0.47 | -2.34 | -4.59,  -0.10 | **0.041** |
| 5 years | -0.02 | -0.04,  -0.00 | **0.036** | -0.03 | -0.05,  -0.02 | **<0.001** | -0.02 | -0.03,  -0.00 | **0.007** | 3.66 | -1.72,  9.04 | 0.18 | 0.36 | -2.41,  3.13 | 0.80 | -4.29 | -6.57,  -2.00 | **<0.001** |
| CRF | 0.00 | -0.00,  0.00 | 0.42 | 0.00 | -0.00,  0.00 | 0.48 | -0.00 | -0.00,  0.00 | 0.86 | 0.08 | -0.41,  0.57 | 0.75 | -0.07 | -0.32,  0.18 | 0.59 | 0.09 | -0.12,  0.30 | 0.40 |

*p*-values < 0.05 are in bold font. Single asterisk (*) indicates interaction. Beta (β) is the estimated regression coefficient, CI is the 95% confidence interval. In the table, 1 year, 3 years and 5 years are compared to baseline and relative to the control group.Volumes of the long axis are included in the model as mL, the subfields are reported as mm3. CA1=cornus ammonis 1; CA3=cornus ammonis 3; DG=dentate gyrus. Head, body and tail are from the long-axis, while CA1, CA3 and DG are from the subfields. MICT: Moderate intensity continuous training; HIIT: High intensity interval training; CRF: Cardiorespiratory fitness measures as VO2peak. The analysis is corrected for age at baseline, sex and education. Brain volumes were corrected for intracranial volume (ICV) using the residual method.

**Supplementary Table 9.** Linear mixed model analyses of brain volumes during 5 years of intervention (Model 1) in combined MICT&HIIT group compared to control group

|  | **Hippocampus** | | | **Caudate** | | | **Thalamus** | | | **Cortex** | | | **White matter** | | |
| --- | --- | --- | --- | --- | --- | --- | --- | --- | --- | --- | --- | --- | --- | --- | --- |
|  | *β* | *CI* | *p* | *β* | *CI* | *p* | *β* | *CI* | *p* | *β* | *CI* | *p* | *β* | *CI* | *p* |
| 1year * MICT&HIIT | 0.01 | -0.07,  0.09 | 0.83 | -0.01 | -0.09,  0.08 | 0.86 | -0.02 | -0.11,  0.06 | 0.61 | -2.24 | -6.40,  1.92 | 0.29 | -0.03 | -7.33,  7.27 | 0.99 |
| 3 years * MICT&HIIT | -0.07 | -0.15,  0.01 | 0.10 | -0.05 | -0.13,  0.04 | 0.28 | -0.08 | -0.17,  0.00 | 0.06 | -4.39 | -8.68,  -0.10 | **0.04** | 4.33 | -3.18,  11.84 | 0.26 |
| 5 years * MICT&HIIT | -0.11 | -0.19,  -0.02 | **0.01** | -0.04 | -0.13,  0.05 | 0.36 | -0.11 | -0.20,  -0.02 | **0.01** | -1.32 | -5.66,  3.02 | 0.55 | 1.24 | -6.36,  8.84 | 0.75 |
| 1 year | -0.09 | -0.15,  -0.03 | **0.002** | -0.09 | -0.15,  -0.03 | **0.01** | -0.13 | -0.20,  -0.07 | **<0.001** | -3.46 | -6.57,  -0.35 | **0.03** | 0.45 | -4.95,  5.85 | 0.87 |
| 3 years | -0.18 | -0.24,  -0.12 | **<0.001** | -0.12 | -0.18,  -0.05 | **<0.001** | -0.26 | -0.32,  -0.19 | **<0.001** | -4.99 | -8.19,  -1.79 | **0.002** | -4.00 | -9.55,  1.56 | 0.16 |
| 5 years | -0.32 | -0.38,  -0.25 | **<0.001** | -0.20 | -0.27,  -0.14 | **<0.001** | -0.52 | -0.59,  -0.45 | **<0.001** | -20.41 | -23.71,  -17.10 | **<0.001** | -6.03 | -11.76,  -0.29 | **0.04** |

*p*-values < 0.05 are in bold font. Single asterisk (*) indicates interaction. Beta (β) is the estimated regression coefficient, CI is the 95% confidence interval. In the table 1 year, 3 years and 5 years are compared to baseline and relative to the control group. Brain volumes are included in the model as mL. MICT: Moderate intensity continuous training; HIIT: High intensity interval training. The analysis is corrected for age at baseline, sex and education. Brain volumes were corrected for intracranial volume (ICV) using the residual method.

**Supplementary Table 10.** Linear mixed model analyses of brain volumes during 5 years of intervention, corrected for CRF (Model 2), in combined MICT&HIIT group compared to control group

|  | **Hippocampus** | | | **Caudate** | | | **Thalamus** | | | **Cortex** | | | **White matter** | | |
| --- | --- | --- | --- | --- | --- | --- | --- | --- | --- | --- | --- | --- | --- | --- | --- |
|  | *β* | *CI* | *p* | *β* | *CI* | *p* | *β* | *CI* | *p* | *β* | *CI* | *p* | *β* | *CI* | *p* |
| 1 year * MICT&HIIT | 0.02 | -0.06,  0.09 | 0.61 | -0.00 | -0.08,  0.08 | 0.99 | -0.02 | -0.10,  0.07 | 0.68 | -1.88 | -6.00,  2.24 | 0.37 | -0.55 | -8.17,  7.07 | 0.89 |
| 3 years * MICT&HIIT | -0.08 | -0.16,  -0.00 | **0.04** | -0.05 | -0.14,  0.04 | 0.30 | -0.10 | -0.19,  -0.01 | **0.04** | -4.58 | -9.00,  -0.15 | **0.04** | 3.33 | -4.85,  11.51 | 0.43 |
| 5 years * MICT&HIIT | -0.09 | -0.18,  -0.01 | **0.02** | -0.02 | -0.12,  0.07 | 0.61 | -0.12 | -0.21,  -0.03 | **0.01** | -1.11 | -5.59,  3.37 | 0.63 | 0.11 | -8.16,  8.39 | 0.98 |
| 1 year | -0.10 | -0.15,  -0.04 | **0.001** | -0.09 | -0.15,  -0.02 | **0.01** | -0.14 | -0.20,  -0.08 | **<0.001** | -3.61 | -6.69,  -0.52 | **0.02** | 0.58 | -5.09,  6.24 | 0.84 |
| 3 years | -0.16 | -0.22,  -0.10 | **<0.001** | -0.10 | -0.17,  -0.04 | **0.002** | -0.25 | -0.32,  -0.18 | **<0.001** | -4.72 | -8.04,  -1.39 | **0.01** | -3.28 | -9.39,  2.82 | 0.29 |
| 5 years | -0.31 | -0.37,  -0.25 | **<0.001** | -0.21 | -0.28,  -0.14 | **<0.001** | -0.50 | -0.57,  -0.44 | **<0.001** | -20.63 | -24.01,  -17.24 | **<0.001** | -5.09 | -11.30,  1.12 | 0.11 |
| CRF | 0.00 | -0.00,  0.01 | 0.16 | 0.00 | -0.01,  0.01 | 0.84 | 0.00 | -0.00,  0.01 | 0.24 | 0.07 | -0.21,  0.36 | 0.62 | 0.17 | -0.38,  0.72 | 0.55 |

*p*-values < 0.05 are in bold font. Single asterisk (*) indicates interaction. Beta (β) is the estimated regression coefficient, CI is the 95% confidence interval. In the table 1 year, 3 years and 5 years are compared to baseline and relative to the control group.Brain volumes are included in the model as mL. MICT: Moderate intensity continuous training; HIIT: High intensity interval training; CRF: Cardiorespiratory fitness measured as VO2peak. The analysis is corrected for age at baseline, sex and education. Brain volumes were corrected for intracranial volume (ICV) using the residual method.

**Supplementary Table 11.** Linear mixed model analyses of the hippocampal long-axis and subfield volumes during 5 years of intervention (Model 1) in combined MICT&HIIT group compared to control group

|  | **Head** | | | **Body** | | | **Tail** | | | **CA1** | | | **CA3** | | | **DG** | | |
| --- | --- | --- | --- | --- | --- | --- | --- | --- | --- | --- | --- | --- | --- | --- | --- | --- | --- | --- |
|  | *β* | *CI* | *p* | *β* | *CI* | *p* | *β* | *CI* | *p* | *β* | *CI* | *p* | *β* | *CI* | *p* | *β* | *CI* | *p* |
| 1 year * MICT&HIIT | 0.00 | -0.02,  0.03 | 0.87 | -0.00 | -0.02,  0.02 | 0.82 | -0.00 | -0.02,  0.02 | 0.95 | -3.43 | -10.21,  3.35 | 0.32 | 0.81 | -2.91,  4.52 | 0.67 | 0.48 | -2.42,  3.39 | 0.74 |
| 3 years * MICT&HIIT | -0.01 | -0.04,  0.02 | 0.47 | -0.02 | -0.04,  -0.00 | **0.02** | -0.00 | -0.02,  0.01 | 0.67 | -7.20 | -14.19,  -0.22 | **0.04** | -0.17 | -4.00,  3.65 | 0.93 | -0.12 | -3.12,  2.87 | 0.94 |
| 5 years * MICT&HIIT | -0.02 | -0.05,  0.01 | 0.13 | -0.01 | -0.03,  0.01 | 0.40 | 0.00 | -0.01,  0.02 | 0.74 | -8.37 | -15.43,  -1.31 | **0.02** | -1.93 | -5.80,  1.94 | 0.33 | 0.22 | -2.81,  3.24 | 0.89 |
| 1 year | -0.01 | -0.03,  0.01 | 0.43 | -0.01 | -0.02,  0.01 | 0.27 | -0.01 | -0.02,  0.00 | 0.24 | 2.04 | -2.96,  7.03 | 0.42 | -1.33 | -4.06,  1.41 | 0.34 | -2.14 | -4.28,  -0.01 | **0.04** |
| 3 years | -0.02 | -0.04,  -0.00 | **0.04** | -0.01 | -0.02,  0.01 | 0.42 | -0.01 | -0.02,  0.00 | 0.23 | 2.40 | -2.74,  7.53 | 0.36 | -1.00 | -3.82,  1.81 | 0.49 | -2.84 | -5.04,  -0.64 | **0.01** |
| 5 years | -0.02 | -0.04,  -0.00 | **0.02** | -0.03 | -0.05,  -0.02 | **<0.001** | -0.02 | -0.03,  -0.01 | **0.01** | 3.04 | -2.26,  8.34 | 0.26 | 0.12 | -2.79,  3.02 | 0.94 | -4.28 | -6.55,  -2.00 | **<0.001** |

*p*-values < 0.05 are in bold font. Single asterisk (*) indicates interaction. Beta (β) is the estimated regression coefficient, CI is the 95% confidence interval. In the table 1 year, 3 years and 5 years are compared to baseline and relative to the control group.Volumes of the long axis are included in the model as mL, the subfields are reported as mm3. CA1=cornus ammonis 1; CA3=cornus ammonis 3; DG=dentate gyrus. Head, body and tail are from the long-axis, while CA1, CA3 and DG are from the subfields. MICT: Moderate intensity continuous training; HIIT: High intensity interval training. The analysis is corrected for age at baseline, sex and education. Brain volumes were corrected for intracranial volume (ICV) using the residual method.

**Supplementary Table 12.** Linear mixed model analyses of the hippocampal long-axis and subfield volumes during 5 years of intervention, corrected for CRF (Model 2) in combined MICT&HIIT group compared to control group

|  | **Head** | | | **Body** | | | **Tail** | | | **CA1** | | | **CA3** | | | **DG** | | |
| --- | --- | --- | --- | --- | --- | --- | --- | --- | --- | --- | --- | --- | --- | --- | --- | --- | --- | --- |
|  | *β* | *CI* | *p* | *β* | *CI* | *p* | *β* | *CI* | *p* | *β* | *CI* | *p* | *β* | *CI* | *p* | *β* | *CI* | *p* |
| 1 year * MICT&HIIT | 0.00 | -0.02,  0.03 | 0.83 | -0.00 | -0.02,  0.02 | 0.85 | -0.00 | -0.02,  0.01 | 0.90 | -3.05 | -9.79,  3.70 | 0.38 | 1.00 | -2.47,  4.48 | 0.57 | 0.55 | -2.29,  3.38 | 0.71 |
| 3 years * MICT&HIIT | -0.01 | -0.03,  0.02 | 0.69 | -0.02 | -0.04,  -0.00 | **0.04** | -0.00 | -0.02,  0.02 | 0.84 | -7.75 | -14.99,  -0.52 | **0.04** | 0.21 | -3.51,  3.94 | 0.91 | -0.64 | -3.68,  2.40 | 0.68 |
| 5 years * MICT&HIIT | -0.02 | -0.05,  0.01 | 0.20 | -0.01 | -0.03,  0.01 | 0.57 | 0.00 | -0.02,  0.02 | 0.90 | -8.00 | -15.32,  -0.67 | **0.03** | -2.35 | -6.13,  1.42 | 0.22 | 0.67 | -2.40,  3.75 | 0.67 |
| 1 year | -0.01 | -0.03,  0.01 | 0.36 | -0.01 | -0.02,  0.00 | 0.18 | -0.01 | -0.02,  0.00 | 0.26 | 1.65 | -3.34,  6.63 | 0.52 | -1.46 | -4.03,  1.11 | 0.27 | -2.34 | -4.43,  -0.24 | **0.03** |
| 3 years | -0.02 | -0.04,  -0.00 | **0.04** | -0.01 | -0.02,  0.01 | 0.33 | -0.01 | -0.02,  0.00 | 0.06 | 3.29 | -2.08,  8.65 | 0.23 | -1.00 | -3.76,  1.77 | 0.48 | -2.34 | -4.60,  -0.09 | **0.04** |
| 5 years | -0.02 | -0.04,  -0.00 | **0.04** | -0.03 | -0.05,  -0.02 | **<0.001** | -0.02 | -0.03,  -0.00 | **0.007** | 3.68 | -1.78,  9.15 | 0.19 | 0.33 | -2.48,  3.15 | 0.82 | -4.31 | -6.60,  -2.01 | **<0.001** |
| CRF | 0.00 | -0.00,  0.00 | 0.42 | 0.00 | -0.00,  0.00 | 0.47 | -0.00 | -0.00,  0.00 | 0.89 | 0.10 | -0.40,  0.59 | 0.70 | -0.09 | -0.35,  0.16 | 0.47 | 0.08 | -0.13,  0.28 | 0.48 |

*p*-values < 0.05 are in bold font. Single asterisk (*) indicates interaction. Beta (β) is the estimated regression coefficient, CI is the 95% confidence interval. In the table 1 year, 3 years and 5 years are compared to baseline and relative to the control group.Volumes of the long axis are included in the model as mL, the subfields are reported as mm3. CA1=cornus ammonis 1; CA3=cornus ammonis 3; DG=dentate gyrus. Head, body and tail are from the long-axis, while CA1, CA3 and DG are from the subfields. MICT: Moderate intensity continuous training; HIIT: High intensity interval training; CRF: Cardiorespiratory fitness measures as VO2peak. The analysis is corrected for age at baseline, sex and education. Brain volumes were corrected for intracranial volume (ICV) using the residual method.

**Supplementary Table 13.** Linear mixed model analyses with CRF as dependent variable during 5 years of intervention in control, MICT and HIIT groups

|  |  | *β* | *CI* | *p*-value |
| --- | --- | --- | --- | --- |
| **Control as reference** | 1 year * MICT | 0.79 | -1.28, 2.87 | 0.46 |
| 3 years * MICT | -0.50 | -2.71, 1.72 | 0.66 |
| 5 years * MICT | -0.01 | -2.23, 2.20 | 0.99 |
| 1 year * HIIT | 0.21 | -1.61, 2.03 | 0.82 |
| 3 years * HIIT | 1.07 | -0.85, 2.99 | 0.27 |
| 5 years * HIIT | 0.98 | -1.05, 3.00 | 0.34 |
| 1 year | 1.33 | 0.12, 2.54 | **0.03** |
| 3 years | 0.06 | -1.26, 1.37 | 0.93 |
| 5 years | -1.29 | -2.64, 0.05 | 0.06 |
| **MICT as reference** | 1 year * Controls | -0.79 | -2.87, 1.28 | 0.46 |
| 3 years * Controls | -0.50 | -1.72, 2.71 | 0.66 |
| 5 years * Controls | 0.01 | -2.20, 2.23 | 0.99 |
| 1 year * HIIT | -0.58 | -2.78, 1.62 | 0.61 |
| 3 years * HIIT | 1.57 | -0.72, 3.87 | 0.18 |
| 5 years * HIIT | 0.99 | -1.36, 3.34 | 0.41 |
| 1 year | 2.12 | 0.39, 3.85 | **0.02** |
| 3 years | -0.44 | -2.26, 1.38 | 0.64 |
| 5 years | -1.30 | -3.10, 0.50 | 0.16 |
| **HIIT as reference** | 1 year * Controls | -0.21 | -2.03, 1.61 | 0.82 |
| 3 years * Controls | -1.07 | -2.99, 0.85 | 0.27 |
| 5 years * Controls | -0.98 | -3.00, 1.05 | 0.34 |
| 1 year * MICT | 0.58 | -1.62, 2.78 | 0.61 |
| 3 years * MICT | -1.57 | -3.87, 0.72 | 0.18 |
| 5 years * MICT | -0.99 | -3.34, 1.36 | 0.41 |
| 1 year | 1.54 | 0.13, 2.95 | **0.03** |
| 3 years | 1.13 | -0.31, 2.58 | 0.13 |
| 5 years | -0.32 | -1.87, 1.24 | 0.69 |

*p*-values < 0.05 are in bold font. Single asterisk (*) indicates interaction. Beta (β) is the estimated regression coefficient, CI is the 95% confidence interval. In the table 1 year, 3 years and 5 years are compared to baseline and relative to the reference group.MICT: Moderate intensity continuous training; HIIT: High intensity interval training; CRF: cardiorespiratory fitness measures as VO2peak. The analysis is corrected for age at baseline, sex and education.

**Supplementary Table 14.** Longitudinal linear mixed model analyses with CRF as dependent variable during 5 years of intervention in combined MICT&HIIT group compared to control group

|  | β | CI | p |
| --- | --- | --- | --- |
| 1 year * MICT&HIIT | 0.44 | -1.17,2.04 | 0.60 |
| 3 years * MICT&HIIIT | 0.48 | -1.24,2.19 | 0.59 |
| 5 years * MICT&HIIT | 0.55 | -1.22,2.32 | 0.54 |
| 1 year | 1.33 | 0.11,2.55 | **0.03** |
| 3 years | 0.06 | -1.26,1.39 | 0.93 |
| 5 years | -1.29 | -2.65,0.07 | 0.06 |

*p*-values < 0.05 are in bold font. Single asterisk (*) indicates interaction. Beta (β) is the estimated regression coefficient, CI is the 95% confidence interval. In the table 1 year, 3 years and 5 years are compared to baseline and relative to the control group.MICT: Moderate intensity continuous training; HIIT: High intensity interval training; CRF: cardiorespiratory fitness measures as VO2peak. The analysis is corrected for age at baseline, sex and education.

# References

1. Bragantini D, Sivertsen B, Gehrman P, Lydersen S, Güzey IC. Genetic polymorphisms associated with sleep-related phenotypes; relationships with individual nocturnal symptoms of insomnia in the HUNT study. *BMC medical genetics.* 2019;20(1):1-7.

2. Gibbons RJ, Balady GJ, Beasley JW, et al. ACC/AHA Guidelines for Exercise Testing. A report of the American College of Cardiology/American Heart Association Task Force on Practice Guidelines (Committee on Exercise Testing). *J Am Coll Cardiol.* 1997;30(1):260-311.

3. Stensvold D, Sandbakk SB, Viken H, et al. Cardiorespiratory reference data in older adults: the generation 100 study. *Medicine and science in sports and exercise.* 2017;49(11):2206.

4. Stensvold D, Viken H, Steinshamn SL, et al. Effect of exercise training for five years on all cause mortality in older adults—the Generation 100 study: randomised controlled trial. *BMJ.* 2020;371:m3485.

5. Borg G. Ratings of perceived exertion and heart rates during short-term cycle exercise and their use in a new cycling strength test. *Int J Sports Med.* 1982;3(3):153-158.
